# Supplementary material for: Assembly and Connection of Micropatterned Single Neurons for Neuronal Network Formation
Source: MDPI journal article supplement (doi:10.3390/mi9050235), 2018-05-15
Supplement: s1 [file s1]

# Supplementary Materials: Assembly and Connection of Micropatterned Single Neurons for Neuronal Network Formation

Shotaro Yoshida, Midori Kato-Negishi and Shoji Takeuchi

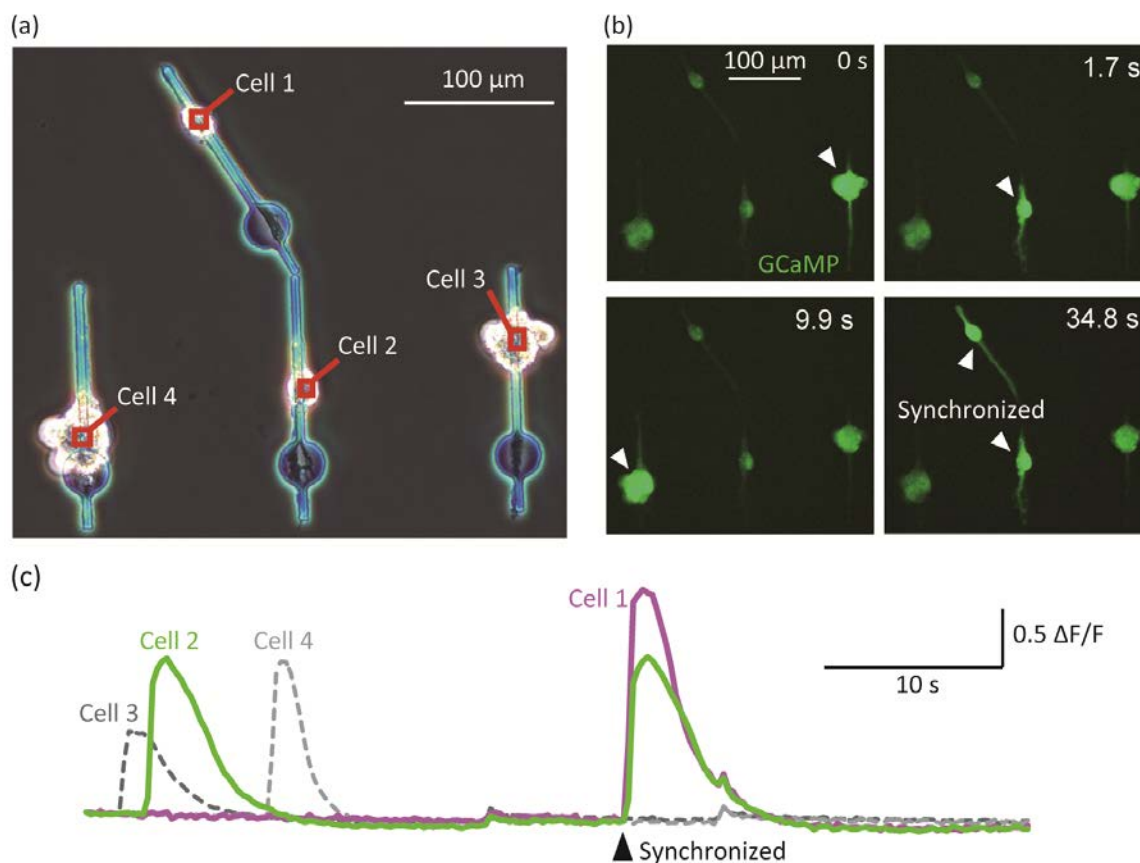

**Figure S1.** Long traces of intracellular  $\text{Ca}^{2+}$  of adjoined neurons. (a) Four microplates with neurons adhered. The two microplates at the center have single neurons as shown in Figure 5d. (b) Fluorescence of GCaMP6 at 0, 1.7, 9.9, 34.8 s. The fluorescence of each neuron increased at each frame. (c) Long traces of averaged fluorescent intensities of cell 1, 2, 3, 4 in (a). The cell 1 and 2 synchronized at 34.8 s.

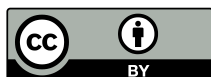

© 2018 by the authors. Submitted for possible open access publication under the terms and conditions of the Creative Commons Attribution (CC BY) license (<http://creativecommons.org/licenses/by/4.0/>).
